# Supplementary material for: Integrative clinical and biopathology analyses to understand the clinical heterogeneity of infantile rhabdomyosarcoma: A report from the French MMT committee
Source: PubMed Central journal article supplement (PMC7163108; doi:10.1002/cam4.2713), 2020-02-22
Supplement: CAM4-9-2698-s001.pdf [file CAM4-9-2698-s001.pdf]

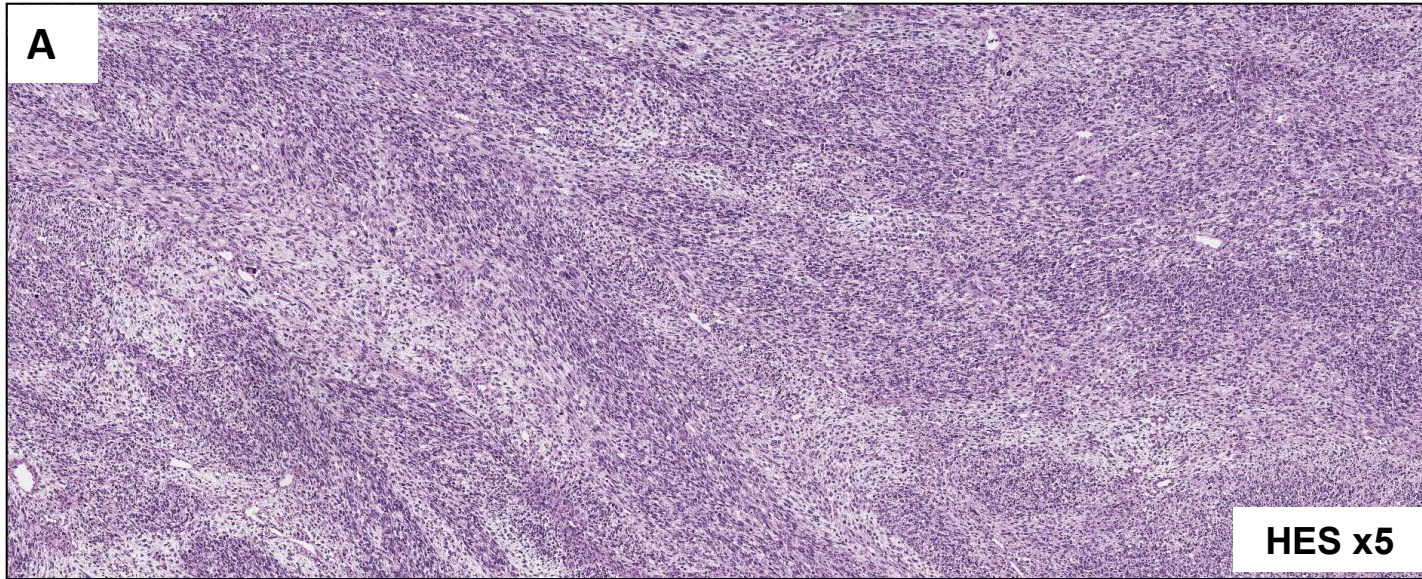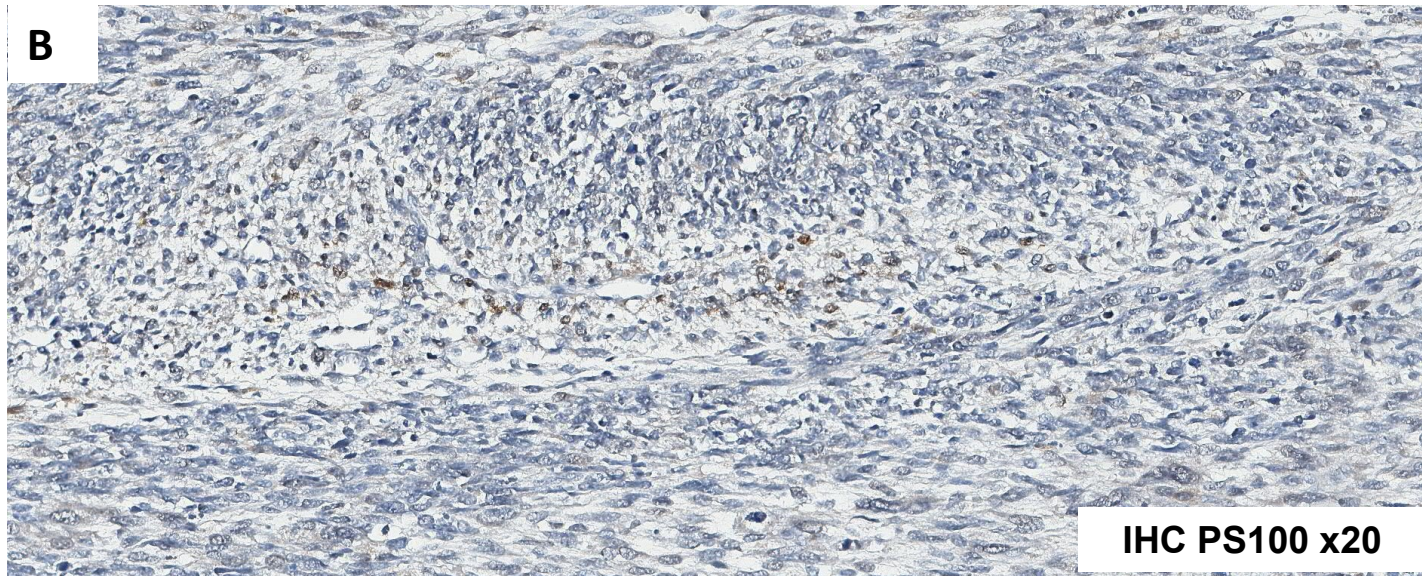

**Supplementary Figure 1. Morphology and Immunohistochemistry (IHC) of « Triton-like » SRMS**  
A- Hematoxylin-eosin-safran [HES] Coloration zoom x5 B- Focal Positive immunostaining for PS100
